# Supplementary material for: Proteomic and Ultrastructural Analysis of Cellulite—New Findings on an Old Topic
Source: MDPI journal article supplement (doi:10.3390/ijms21062077), 2020-03-18
Supplement: s1 [file s1]

### Adipose Tissue

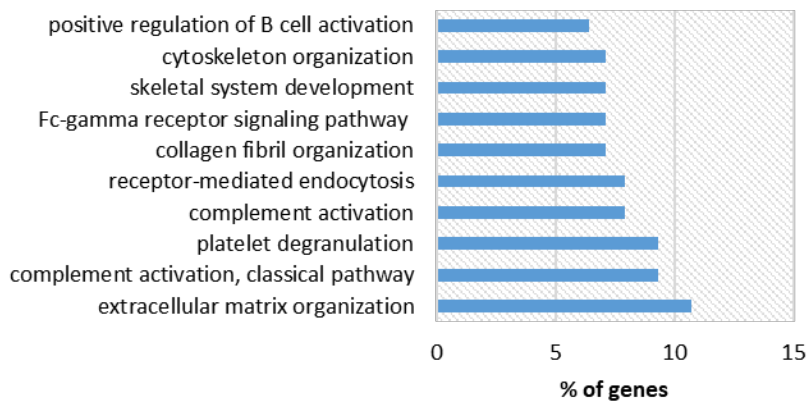

### MUSE cells

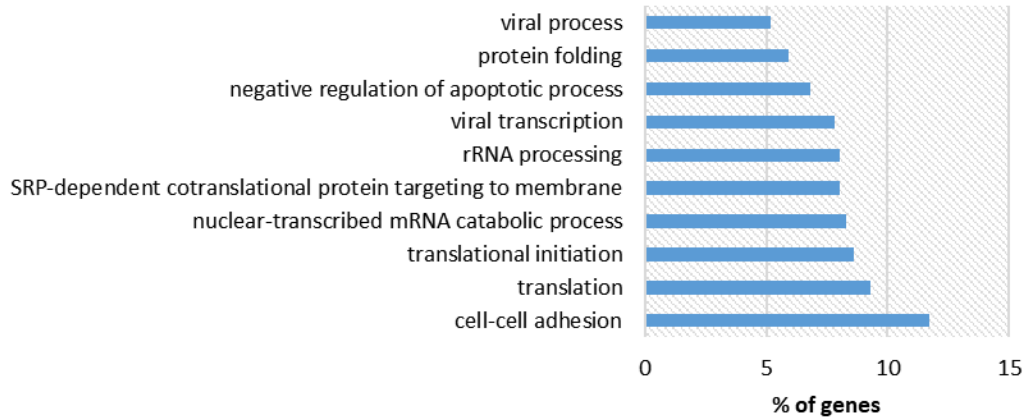

Supplementary S1

Biological process

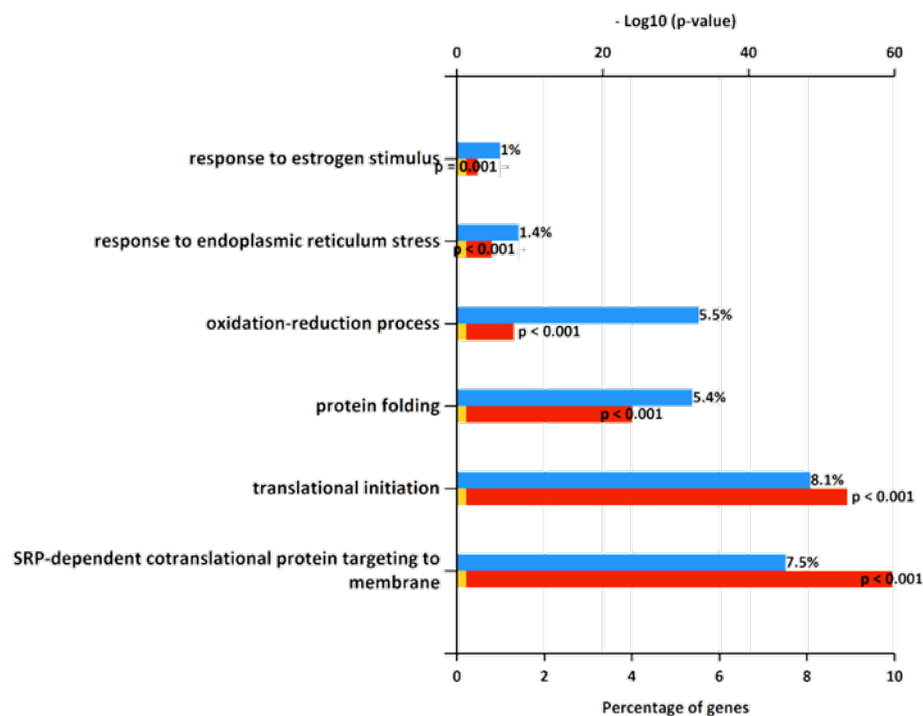

Biological process

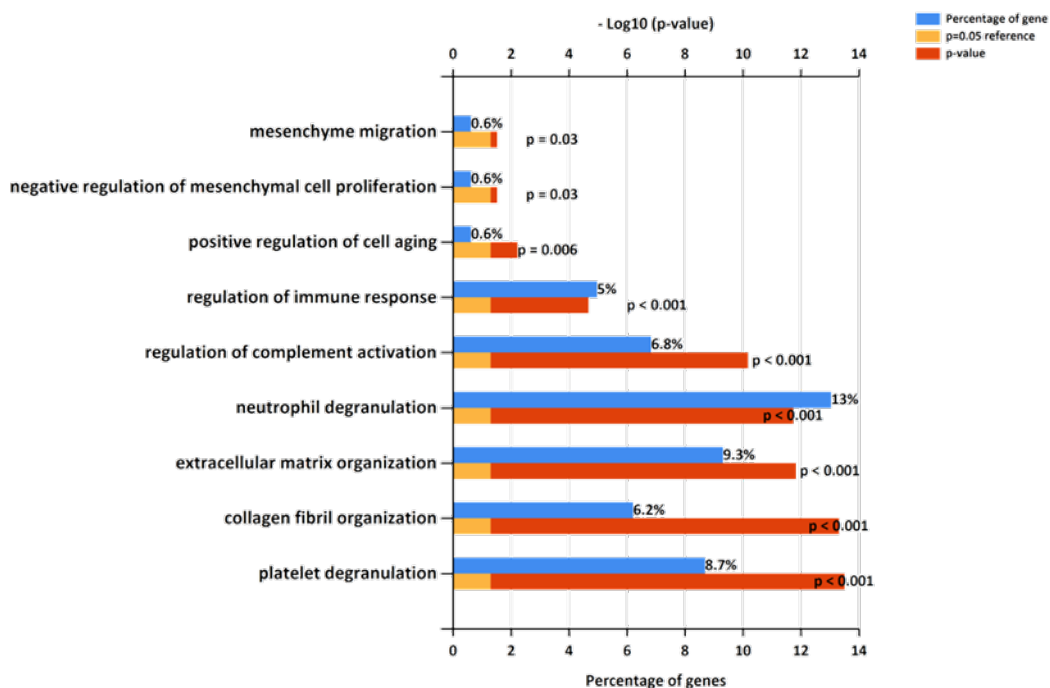

- Oxidation-reduction process
- cellular response to stress
- regulation of cell adhesion

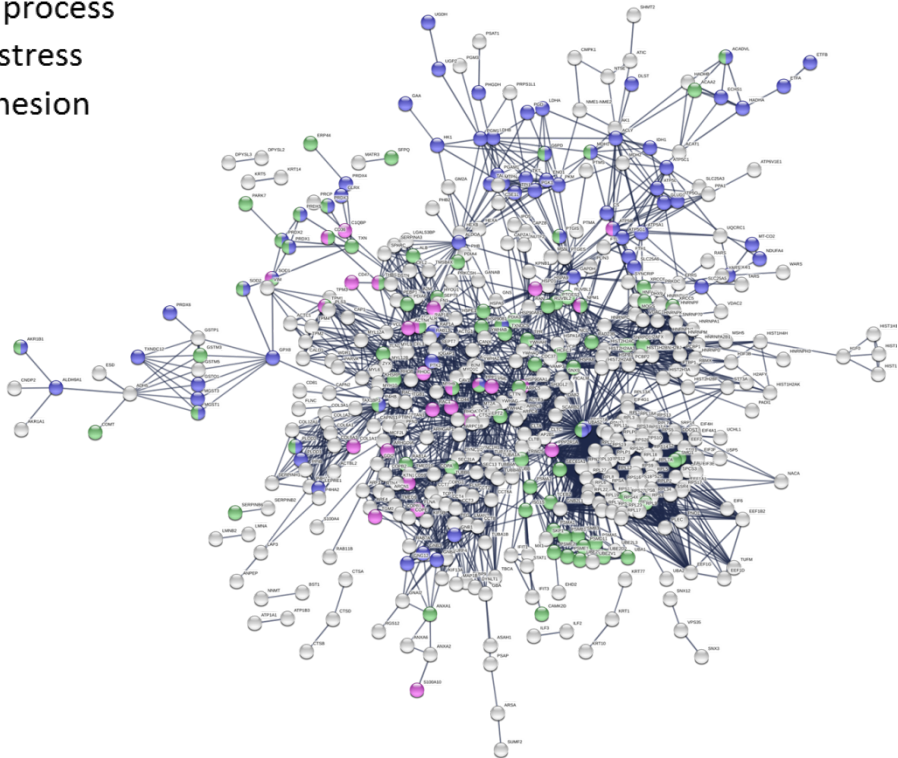

- Regulation of immune system
- Focal adhesion

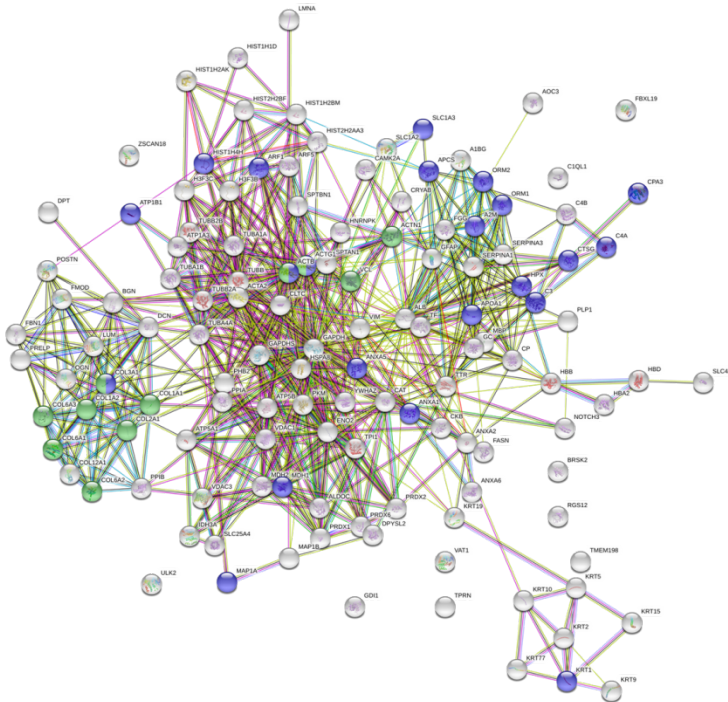

Supplementary S3
